# Supplementary material for: A protocol for a critical realist synthesis of school mindfulness interventions designed to promote pupils’ mental wellbeing
Source: Frontiers journal article supplement (doi:10.3389/fpubh.2023.1309649), 2024-01-08
Supplement: Data_Sheet_5.PDF [file Data_Sheet_5.PDF]

## Supplementary Material 5: Search Strategy

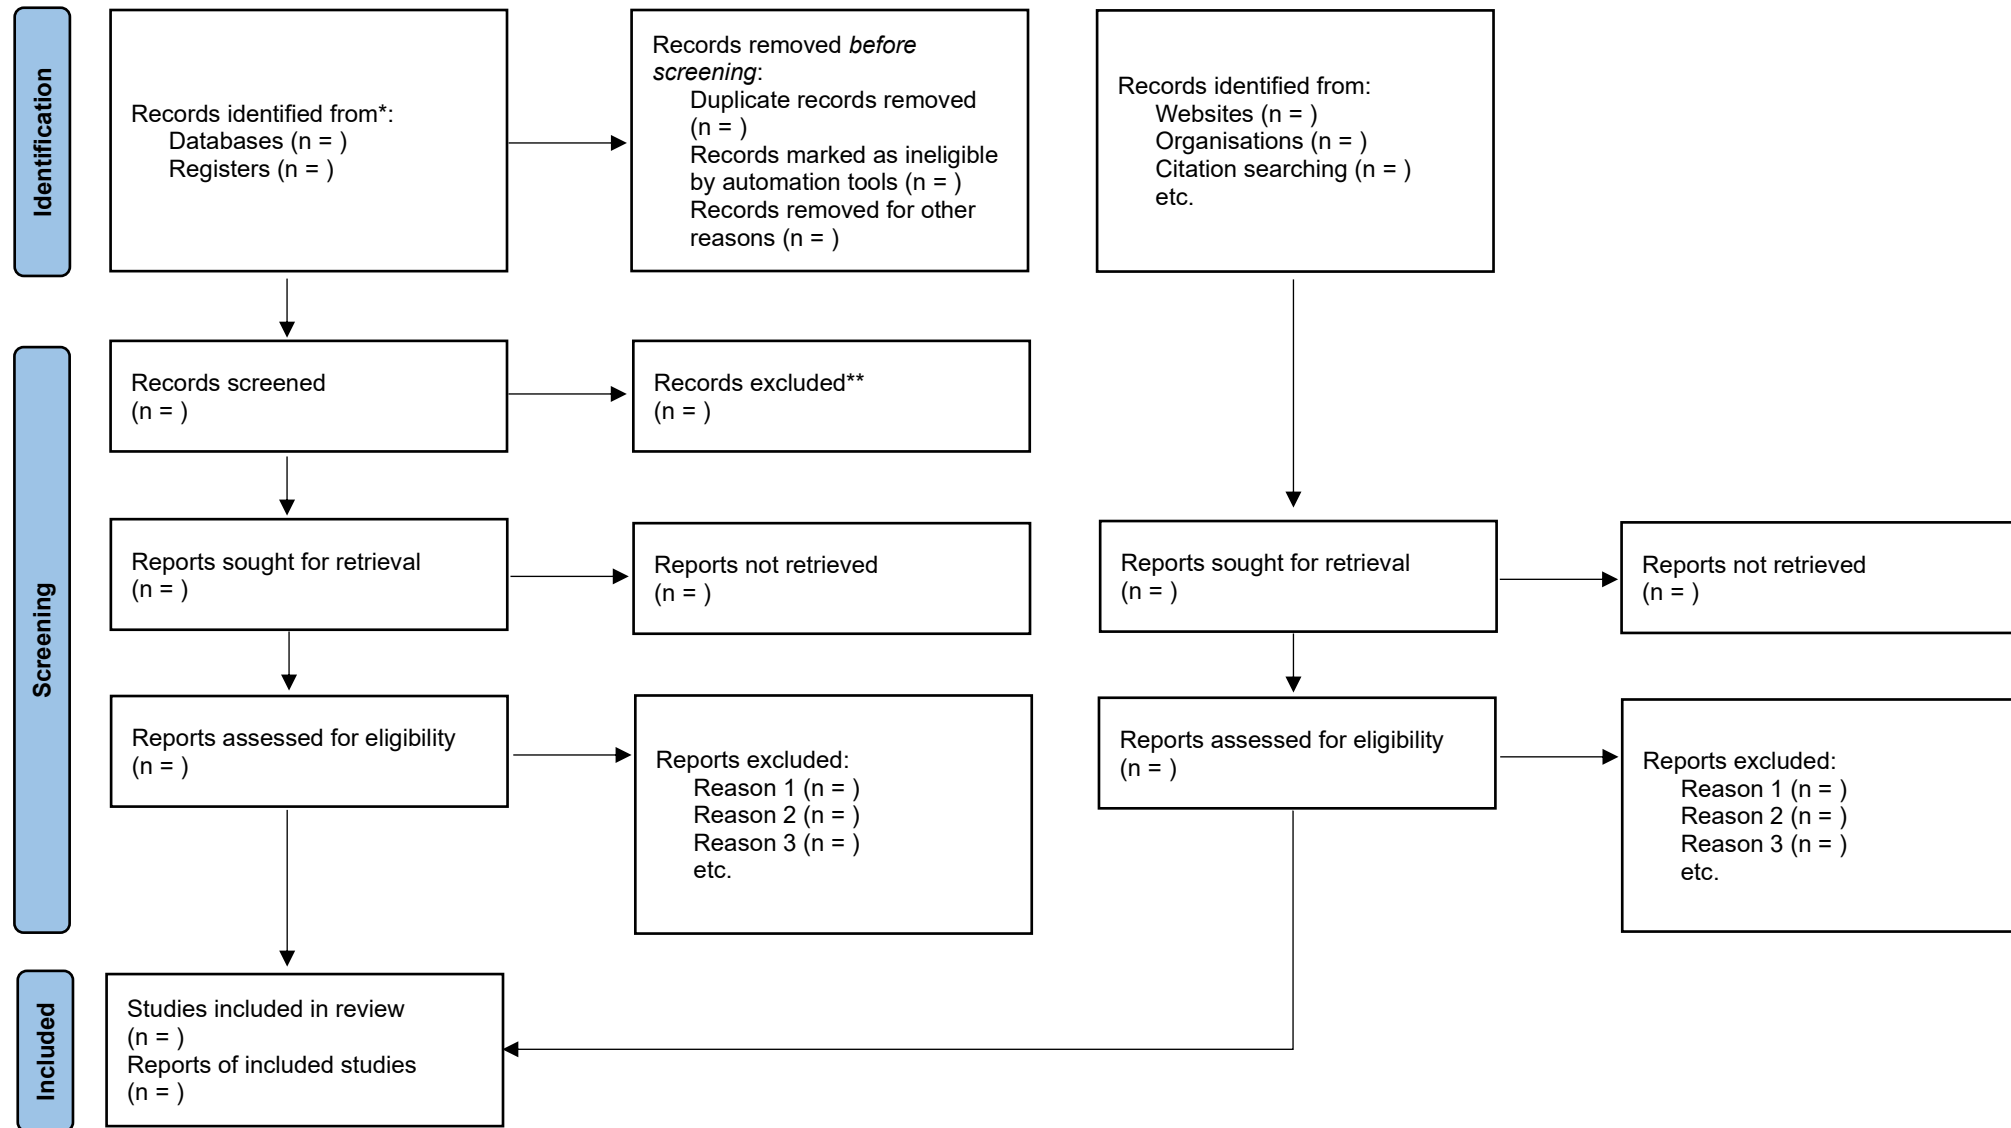

*Source:* Page MJ, McKenzie JE, Bossuyt PM, Boutron I, Hoffmann TC, Mulrow CD, et al. The PRISMA 2020 statement: an updated guideline for reporting systematic reviews. BMJ 2021;372:n71. doi: 10.1136/bmj.n71. For more information, visit: <http://www.prisma-statement.org/>
